# Supplementary material
Source: MDPI journal article supplement (https://www.mdpi.com/2073-4344/13/3/507)
Supplement: s1 [file s1]

Supporting Information for:

# Synthesis of Cobalt Complex Containing trans-cinnamate and Its Electrocatalytic Activity for Oxygen Evolution Reaction

Jimin Lee <sup>1,†</sup>, Hyewon Shin <sup>1,†</sup>, Sunwoo Geum <sup>1</sup>, Sowon Lee <sup>1</sup>, Kang Min Ok <sup>2</sup>, Junghwan Do <sup>1,\*</sup>,  
and Seong Jung Kwon <sup>1,\*</sup>

<sup>1</sup>Department of Chemistry, Konkuk University, 120 Neungdong-ro, Gwangjin-gu, Seoul 05029, Republic of Korea

<sup>2</sup>Department of Chemistry, Sogang University, 35 Baekbeom-ro, Mapo-gu, Seoul 04107, Republic of Korea

\*Correspondence: junghwan@konkuk.ac.kr (J.D.); sjkwon@konkuk.ac.kr (S.J.K.);  
Tel.: +82-2-450-0429 (S.J.K.)

<sup>†</sup>These authors contributed equally to this work.

## CONTENTS:

Tables S1–S3: Crystal data and structure refinement details, atomic coordinate, and selected bond lengths and angles for **1**.

Figure S1: The powder XRD pattern of **1**.

Figure S2: IR of **1**.

Table S1. Crystal data and structure refinement for **1**.

|                                   |                                                                      |                                 |
|-----------------------------------|----------------------------------------------------------------------|---------------------------------|
| Empirical formula                 | $\text{C}_{44} \text{H}_{39} \text{Co}_2 \text{N}_6 \text{O}_{11.5}$ |                                 |
| Formula weight                    | 953.67                                                               |                                 |
| Temperature                       | 296(2) K                                                             |                                 |
| Wavelength                        | 0.71073 Å                                                            |                                 |
| Crystal system                    | Triclinic                                                            |                                 |
| Space group                       | P -1                                                                 |                                 |
| Unit cell dimensions              | $a = 9.46580(10)$ Å                                                  | $\alpha = 108.1025(10)^\circ$ . |
|                                   | $b = 14.3195(2)$ Å                                                   | $\beta = 101.8118(9)^\circ$ .   |
|                                   | $c = 18.1311(3)$ Å                                                   | $\gamma = 100.4024(10)^\circ$ . |
| Volume                            | $2206.34(6)$ Å <sup>3</sup>                                          |                                 |
| Z                                 | 2                                                                    |                                 |
| Density (calculated)              | 1.436 Mg/m <sup>3</sup>                                              |                                 |
| Absorption coefficient            | 0.820 mm <sup>-1</sup>                                               |                                 |
| F(000)                            | 982                                                                  |                                 |
| Crystal size                      | 0.310 x 0.260 x 0.230 mm <sup>3</sup>                                |                                 |
| Theta range for data collection   | 1.230 to 28.369°.                                                    |                                 |
| Index ranges                      | $-12 \leq h \leq 12$ , $-18 \leq k \leq 19$ , $-24 \leq l \leq 24$   |                                 |
| Reflections collected             | 30393                                                                |                                 |
| Independent reflections           | 10919 [R(int) = 0.0978]                                              |                                 |
| Completeness to theta = 25.242°   | 99.8 %                                                               |                                 |
| Absorption correction             | None                                                                 |                                 |
| Refinement method                 | Full-matrix least-squares on F <sup>2</sup>                          |                                 |
| Data / restraints / parameters    | 10919 / 0 / 590                                                      |                                 |
| Goodness-of-fit on F <sup>2</sup> | 0.886                                                                |                                 |
| Final R indices [I>2sigma(I)]     | R1 = 0.0551, wR2 = 0.1164                                            |                                 |
| R indices (all data)              | R1 = 0.1225, wR2 = 0.1376                                            |                                 |
| Extinction coefficient            | n/a                                                                  |                                 |
| Largest diff. peak and hole       | 0.886 and -0.746 e.Å <sup>-3</sup>                                   |                                 |

Table S2. Atomic coordinates ( $\times 10^4$ ) and equivalent isotropic displacement parameters ( $\text{\AA}^2 \times 10^3$ ) for **1**. U(eq) is defined as one third of the trace of the orthogonalized  $U^{ij}$  tensor.

|       | x        | y        | z       | U(eq) |
|-------|----------|----------|---------|-------|
| Co(1) | -1483(1) | -152(1)  | 3557(1) | 32(1) |
| Co(2) | 2337(1)  | 1062(1)  | 3877(1) | 31(1) |
| N(1)  | -4052(3) | 931(3)   | 4333(2) | 51(1) |
| N(2)  | -3926(3) | -240(2)  | 3170(2) | 34(1) |
| N(3)  | 3729(3)  | 68(2)    | 3344(2) | 33(1) |
| C(1)  | -4759(3) | 240(3)   | 3608(2) | 32(1) |
| C(2)  | -4682(4) | -936(3)  | 2440(2) | 48(1) |
| C(3)  | -6193(4) | -1182(3) | 2153(2) | 58(1) |
| C(4)  | 3047(4)  | -663(3)  | 2625(2) | 45(1) |
| N(4)  | 4155(4)  | 3602(3)  | 4946(2) | 72(1) |
| N(5)  | 4936(4)  | 4103(3)  | 3998(2) | 67(1) |
| N(6)  | 3760(3)  | 2350(2)  | 3706(2) | 44(1) |
| C(5)  | 4274(4)  | 3338(3)  | 4203(3) | 50(1) |
| C(6)  | 5078(6)  | 3838(5)  | 3258(4) | 91(2) |
| C(7)  | 4624(6)  | 2861(5)  | 2715(3) | 83(2) |
| C(8)  | 3955(5)  | 2138(4)  | 2971(3) | 59(1) |
| O(1)  | -976(2)  | 1163(2)  | 4523(2) | 42(1) |
| O(2)  | 1177(3)  | 2050(2)  | 4460(2) | 40(1) |
| C(9)  | 62(4)    | 1970(3)  | 4733(2) | 36(1) |
| C(10) | -137(4)  | 2873(3)  | 5330(2) | 43(1) |
| C(11) | 535(4)   | 3814(3)  | 5481(2) | 45(1) |
| C(12) | 213(5)   | 4733(3)  | 5994(2) | 48(1) |
| C(13) | 1040(5)  | 5694(3)  | 6103(3) | 61(1) |
| C(14) | 706(7)   | 6563(4)  | 6561(3) | 74(2) |
| C(15) | -448(8)  | 6458(5)  | 6906(3) | 89(2) |
| C(16) | -1254(7) | 5521(4)  | 6817(3) | 90(2) |
| C(17) | -934(6)  | 4669(4)  | 6366(3) | 71(1) |
| O(3)  | 3671(2)  | 1438(2)  | 5045(1) | 34(1) |
| O(4)  | -2035(2) | -858(2)  | 4374(1) | 35(1) |
| C(18) | 3191(3)  | 1481(3)  | 5655(2) | 29(1) |

|       |           |          |         |         |
|-------|-----------|----------|---------|---------|
| C(19) | 4014(4)   | 2315(3)  | 6426(2) | 39(1)   |
| C(20) | 5444(4)   | 2768(3)  | 6647(2) | 44(1)   |
| C(21) | 6283(4)   | 3591(3)  | 7415(2) | 43(1)   |
| C(22) | 7757(4)   | 3654(4)  | 7793(3) | 62(1)   |
| C(23) | 8520(5)   | 4425(4)  | 8516(3) | 81(2)   |
| C(24) | 7856(6)   | 5149(4)  | 8871(3) | 89(2)   |
| C(25) | 6395(5)   | 5103(4)  | 8512(3) | 77(2)   |
| C(26) | 5613(4)   | 4322(3)  | 7793(2) | 53(1)   |
| O(5)  | -1755(3)  | -1488(2) | 2629(1) | 40(1)   |
| O(6)  | 160(3)    | -2073(2) | 3074(2) | 51(1)   |
| C(27) | -1077(4)  | -2176(3) | 2609(2) | 39(1)   |
| C(28) | -1889(4)  | -3190(3) | 1962(2) | 45(1)   |
| C(29) | -1725(4)  | -4062(3) | 1999(2) | 47(1)   |
| C(30) | -2543(4)  | -5073(3) | 1399(2) | 47(1)   |
| C(31) | -2646(5)  | -5902(3) | 1635(3) | 65(1)   |
| C(32) | -3423(7)  | -6855(4) | 1105(4) | 87(2)   |
| C(33) | -4101(6)  | -7013(4) | 317(4)  | 94(2)   |
| C(34) | -3983(6)  | -6207(4) | 51(3)   | 80(2)   |
| C(35) | -3212(5)  | -5243(3) | 597(3)  | 60(1)   |
| O(7)  | 1087(3)   | 695(2)   | 2709(1) | 42(1)   |
| O(8)  | -1254(3)  | 605(2)   | 2775(2) | 50(1)   |
| C(36) | -231(4)   | 732(3)   | 2454(2) | 38(1)   |
| C(37) | -582(6)   | 1000(5)  | 1728(3) | 89(2)   |
| C(38) | 515(7)    | 1219(5)  | 1341(3) | 94(2)   |
| C(39) | 491(8)    | 1655(5)  | 678(3)  | 97(2)   |
| C(40) | -573(10)  | 2100(6)  | 466(4)  | 143(3)  |
| C(41) | -670(9)   | 2416(5)  | -168(4) | 118(3)  |
| C(42) | 258(8)    | 2179(6)  | -651(3) | 106(3)  |
| C(43) | 1344(10)  | 1782(7)  | -466(5) | 141(3)  |
| C(44) | 1589(8)   | 1574(6)  | 264(5)  | 131(3)  |
| OW1   | 859(2)    | -174(2)  | 3999(1) | 30(1)   |
| OW2   | -4540(20) | 8(7)     | 419(9)  | 219(9)  |
| OW3   | -6230(40) | 610(40)  | 570(20) | 390(30) |
| OW4   | -6295(18) | -60(13)  | 873(10) | 81(9)   |
| OW5   | -2702(15) | 292(11)  | -48(8)  | 45(6)   |

|     |           |         |          |         |
|-----|-----------|---------|----------|---------|
| OW6 | -2459(14) | 491(10) | 1404(7)  | 88(6)   |
| OW7 | -3430(20) | 288(13) | 546(9)   | 64(7)   |
| OW8 | -4722(19) | 220(16) | 1030(19) | 120(11) |

---

Table S3. Bond lengths [Å] and angles [°] for **1**.

|             |          |
|-------------|----------|
| Co(1)-O(1)  | 2.032(2) |
| Co(1)-O(5)  | 2.048(2) |
| Co(1)-O(8)  | 2.056(3) |
| Co(1)-O(4)  | 2.133(2) |
| Co(1)-OW1   | 2.207(2) |
| Co(1)-N(2)  | 2.244(3) |
| Co(2)-O(7)  | 2.053(2) |
| Co(2)-O(3)  | 2.078(2) |
| Co(2)-O(2)  | 2.105(2) |
| Co(2)-OW1   | 2.148(2) |
| Co(2)-N(6)  | 2.223(3) |
| Co(2)-N(3)  | 2.244(3) |
| N(1)-C(1)   | 1.321(4) |
| N(2)-C(2)   | 1.338(4) |
| N(2)-C(1)   | 1.356(4) |
| N(3)-C(4)   | 1.333(4) |
| N(3)-C(1)#1 | 1.363(4) |
| C(2)-C(3)   | 1.357(5) |
| C(3)-C(4)#2 | 1.361(5) |
| N(4)-C(5)   | 1.317(5) |
| N(5)-C(6)   | 1.319(6) |
| N(5)-C(5)   | 1.353(5) |
| N(6)-C(8)   | 1.331(5) |
| N(6)-C(5)   | 1.353(5) |
| C(6)-C(7)   | 1.365(7) |
| C(7)-C(8)   | 1.367(6) |
| O(1)-C(9)   | 1.270(4) |
| O(2)-C(9)   | 1.255(4) |
| C(9)-C(10)  | 1.477(5) |
| C(10)-C(11) | 1.298(5) |
| C(11)-C(12) | 1.480(5) |
| C(12)-C(13) | 1.387(6) |
| C(12)-C(17) | 1.394(6) |

|              |           |
|--------------|-----------|
| C(13)-C(14)  | 1.395(6)  |
| C(14)-C(15)  | 1.374(7)  |
| C(15)-C(16)  | 1.361(7)  |
| C(16)-C(17)  | 1.364(6)  |
| O(3)-C(18)   | 1.269(4)  |
| O(4)-C(18)#3 | 1.261(4)  |
| C(18)-C(19)  | 1.472(5)  |
| C(19)-C(20)  | 1.308(5)  |
| C(20)-C(21)  | 1.466(5)  |
| C(21)-C(26)  | 1.393(5)  |
| C(21)-C(22)  | 1.396(5)  |
| C(22)-C(23)  | 1.372(6)  |
| C(23)-C(24)  | 1.368(7)  |
| C(24)-C(25)  | 1.382(7)  |
| C(25)-C(26)  | 1.378(5)  |
| O(5)-C(27)   | 1.265(4)  |
| O(6)-C(27)   | 1.249(4)  |
| C(27)-C(28)  | 1.498(5)  |
| C(28)-C(29)  | 1.306(5)  |
| C(29)-C(30)  | 1.467(5)  |
| C(30)-C(31)  | 1.376(6)  |
| C(30)-C(35)  | 1.385(6)  |
| C(31)-C(32)  | 1.364(7)  |
| C(32)-C(33)  | 1.370(7)  |
| C(33)-C(34)  | 1.378(7)  |
| C(34)-C(35)  | 1.381(6)  |
| O(7)-C(36)   | 1.255(4)  |
| O(8)-C(36)   | 1.242(4)  |
| C(36)-C(37)  | 1.474(6)  |
| C(37)-C(38)  | 1.409(7)  |
| C(37)-OW6    | 1.695(13) |
| C(38)-C(39)  | 1.515(8)  |
| C(39)-C(40)  | 1.339(8)  |
| C(39)-C(44)  | 1.402(8)  |
| C(40)-C(41)  | 1.352(8)  |

|                 |            |
|-----------------|------------|
| C(41)-C(42)     | 1.376(9)   |
| C(42)-C(43)     | 1.297(10)  |
| C(43)-C(44)     | 1.428(9)   |
| O(1)-Co(1)-O(5) | 173.61(10) |
| O(1)-Co(1)-O(8) | 92.80(11)  |
| O(5)-Co(1)-O(8) | 88.59(11)  |
| O(1)-Co(1)-O(4) | 84.25(10)  |
| O(5)-Co(1)-O(4) | 95.29(9)   |
| O(8)-Co(1)-O(4) | 170.88(10) |
| O(1)-Co(1)-OW1  | 85.75(9)   |
| O(5)-Co(1)-OW1  | 87.87(9)   |
| O(8)-Co(1)-OW1  | 100.16(9)  |
| O(4)-Co(1)-OW1  | 88.25(8)   |
| O(1)-Co(1)-N(2) | 95.03(10)  |
| O(5)-Co(1)-N(2) | 91.30(10)  |
| O(8)-Co(1)-N(2) | 85.56(10)  |
| O(4)-Co(1)-N(2) | 86.10(9)   |
| OW1-Co(1)-N(2)  | 174.19(9)  |
| O(7)-Co(2)-O(3) | 177.96(9)  |
| O(7)-Co(2)-O(2) | 97.99(10)  |
| O(3)-Co(2)-O(2) | 83.51(9)   |
| O(7)-Co(2)-OW1  | 90.99(9)   |
| O(3)-Co(2)-OW1  | 90.43(8)   |
| O(2)-Co(2)-OW1  | 88.60(9)   |
| O(7)-Co(2)-N(6) | 86.41(11)  |
| O(3)-Co(2)-N(6) | 92.22(10)  |
| O(2)-Co(2)-N(6) | 90.08(11)  |
| OW1-Co(2)-N(6)  | 176.90(10) |
| O(7)-Co(2)-N(3) | 86.31(10)  |
| O(3)-Co(2)-N(3) | 92.16(9)   |
| O(2)-Co(2)-N(3) | 175.42(10) |
| OW1-Co(2)-N(3)  | 92.93(9)   |
| N(6)-Co(2)-N(3) | 88.59(11)  |
| C(2)-N(2)-C(1)  | 116.0(3)   |



|                   |          |
|-------------------|----------|
| C(2)-N(2)-Co(1)   | 115.2(2) |
| C(1)-N(2)-Co(1)   | 128.5(2) |
| C(4)-N(3)-C(1)#1  | 116.4(3) |
| C(4)-N(3)-Co(2)   | 116.1(2) |
| C(1)#1-N(3)-Co(2) | 126.5(2) |
| N(1)-C(1)-N(2)    | 117.7(3) |
| N(1)-C(1)-N(3)#2  | 118.1(3) |
| N(2)-C(1)-N(3)#2  | 124.2(3) |
| N(2)-C(2)-C(3)    | 123.1(4) |
| C(2)-C(3)-C(4)#2  | 117.6(4) |
| N(3)-C(4)-C(3)#1  | 122.6(3) |
| C(6)-N(5)-C(5)    | 115.9(4) |
| C(8)-N(6)-C(5)    | 116.0(3) |
| C(8)-N(6)-Co(2)   | 114.6(3) |
| C(5)-N(6)-Co(2)   | 128.7(3) |
| N(4)-C(5)-N(6)    | 119.6(3) |
| N(4)-C(5)-N(5)    | 115.7(4) |
| N(6)-C(5)-N(5)    | 124.7(4) |
| N(5)-C(6)-C(7)    | 124.0(4) |
| C(6)-C(7)-C(8)    | 116.2(5) |
| N(6)-C(8)-C(7)    | 123.2(5) |
| C(9)-O(1)-Co(1)   | 129.4(2) |
| C(9)-O(2)-Co(2)   | 136.8(2) |
| O(2)-C(9)-O(1)    | 125.4(3) |
| O(2)-C(9)-C(10)   | 119.9(3) |
| O(1)-C(9)-C(10)   | 114.8(3) |
| C(11)-C(10)-C(9)  | 125.8(4) |
| C(10)-C(11)-C(12) | 126.8(4) |
| C(13)-C(12)-C(17) | 117.9(4) |
| C(13)-C(12)-C(11) | 120.1(4) |
| C(17)-C(12)-C(11) | 121.9(4) |
| C(12)-C(13)-C(14) | 120.5(5) |
| C(15)-C(14)-C(13) | 119.3(5) |
| C(16)-C(15)-C(14) | 121.0(5) |
| C(15)-C(16)-C(17) | 119.8(6) |

|                    |            |
|--------------------|------------|
| C(16)-C(17)-C(12)  | 121.5(5)   |
| C(18)-O(3)-Co(2)   | 125.21(19) |
| C(18)#3-O(4)-Co(1) | 132.9(2)   |
| O(4)#3-C(18)-O(3)  | 123.1(3)   |
| O(4)#3-C(18)-C(19) | 119.1(3)   |
| O(3)-C(18)-C(19)   | 117.8(3)   |
| C(20)-C(19)-C(18)  | 125.7(3)   |
| C(19)-C(20)-C(21)  | 126.4(4)   |
| C(26)-C(21)-C(22)  | 118.3(4)   |
| C(26)-C(21)-C(20)  | 120.4(3)   |
| C(22)-C(21)-C(20)  | 121.2(4)   |
| C(23)-C(22)-C(21)  | 120.4(4)   |
| C(24)-C(23)-C(22)  | 120.6(5)   |
| C(23)-C(24)-C(25)  | 120.3(4)   |
| C(26)-C(25)-C(24)  | 119.5(5)   |
| C(25)-C(26)-C(21)  | 120.9(4)   |
| C(27)-O(5)-Co(1)   | 129.2(2)   |
| O(6)-C(27)-O(5)    | 125.8(3)   |
| O(6)-C(27)-C(28)   | 119.7(4)   |
| O(5)-C(27)-C(28)   | 114.5(3)   |
| C(29)-C(28)-C(27)  | 124.4(4)   |
| C(28)-C(29)-C(30)  | 126.2(4)   |
| C(31)-C(30)-C(35)  | 117.8(4)   |
| C(31)-C(30)-C(29)  | 118.8(4)   |
| C(35)-C(30)-C(29)  | 123.4(4)   |
| C(32)-C(31)-C(30)  | 121.2(5)   |
| C(31)-C(32)-C(33)  | 120.6(5)   |
| C(32)-C(33)-C(34)  | 119.9(5)   |
| C(33)-C(34)-C(35)  | 118.9(5)   |
| C(34)-C(35)-C(30)  | 121.6(5)   |
| C(36)-O(7)-Co(2)   | 129.2(2)   |
| C(36)-O(8)-Co(1)   | 129.3(2)   |
| O(8)-C(36)-O(7)    | 126.1(3)   |
| O(8)-C(36)-C(37)   | 116.7(4)   |
| O(7)-C(36)-C(37)   | 117.1(4)   |

|                   |            |
|-------------------|------------|
| C(38)-C(37)-C(36) | 121.7(4)   |
| C(38)-C(37)-OW6   | 133.9(6)   |
| C(36)-C(37)-OW6   | 99.5(6)    |
| C(37)-C(38)-C(39) | 131.1(5)   |
| C(40)-C(39)-C(44) | 119.0(6)   |
| C(40)-C(39)-C(38) | 121.6(6)   |
| C(44)-C(39)-C(38) | 119.4(6)   |
| C(39)-C(40)-C(41) | 121.8(7)   |
| C(40)-C(41)-C(42) | 118.5(7)   |
| C(43)-C(42)-C(41) | 122.5(7)   |
| C(42)-C(43)-C(44) | 119.1(8)   |
| C(39)-C(44)-C(43) | 117.5(7)   |
| Co(2)-OW1-Co(1)   | 109.64(10) |

---

Symmetry transformations used to generate equivalent atoms:

#1  $x+1, y, z$     #2  $x-1, y, z$     #3  $-x, -y, -z+1$     #4  $-x-1, -y, -z$

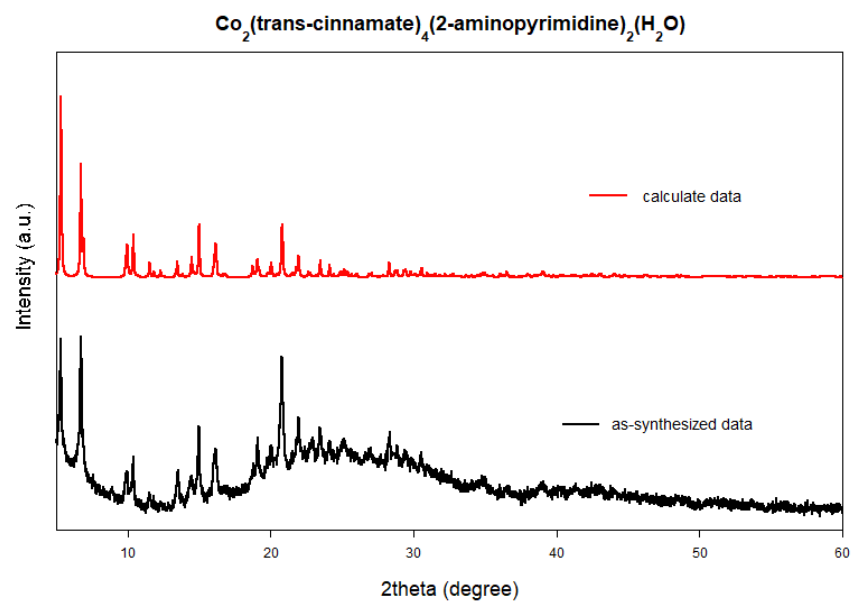

Figure S1: The powder XRD pattern of **1**.

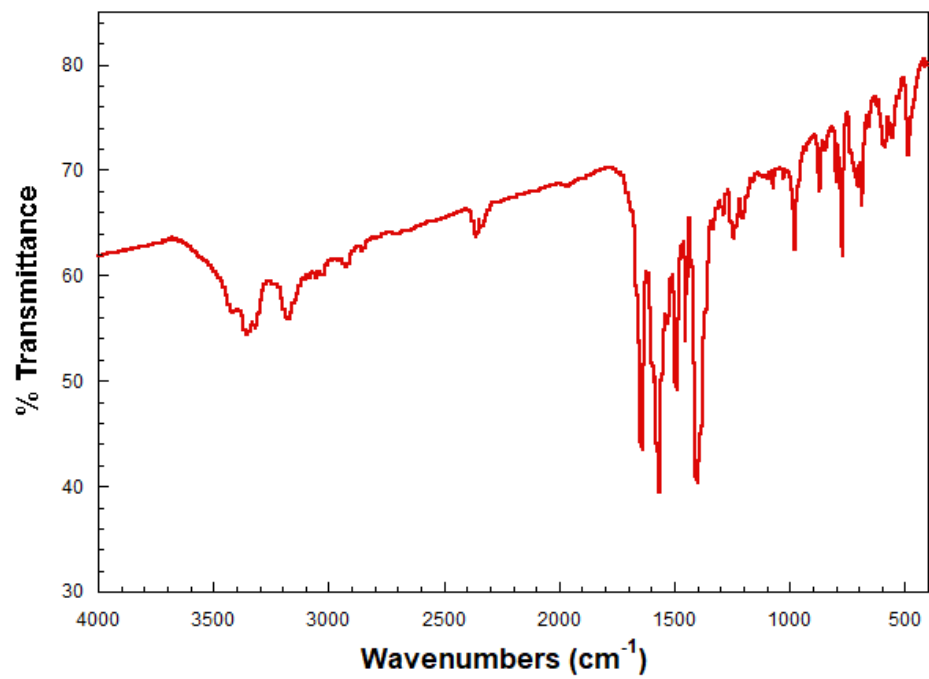

Figure S2: IR of **1**.
